# Supplementary material
Source: PubMed Central journal article supplement (PMC4097165)
Supplement: NIHMS592742-supplement-01.pdf [file NIHMS592742-supplement-01.pdf]

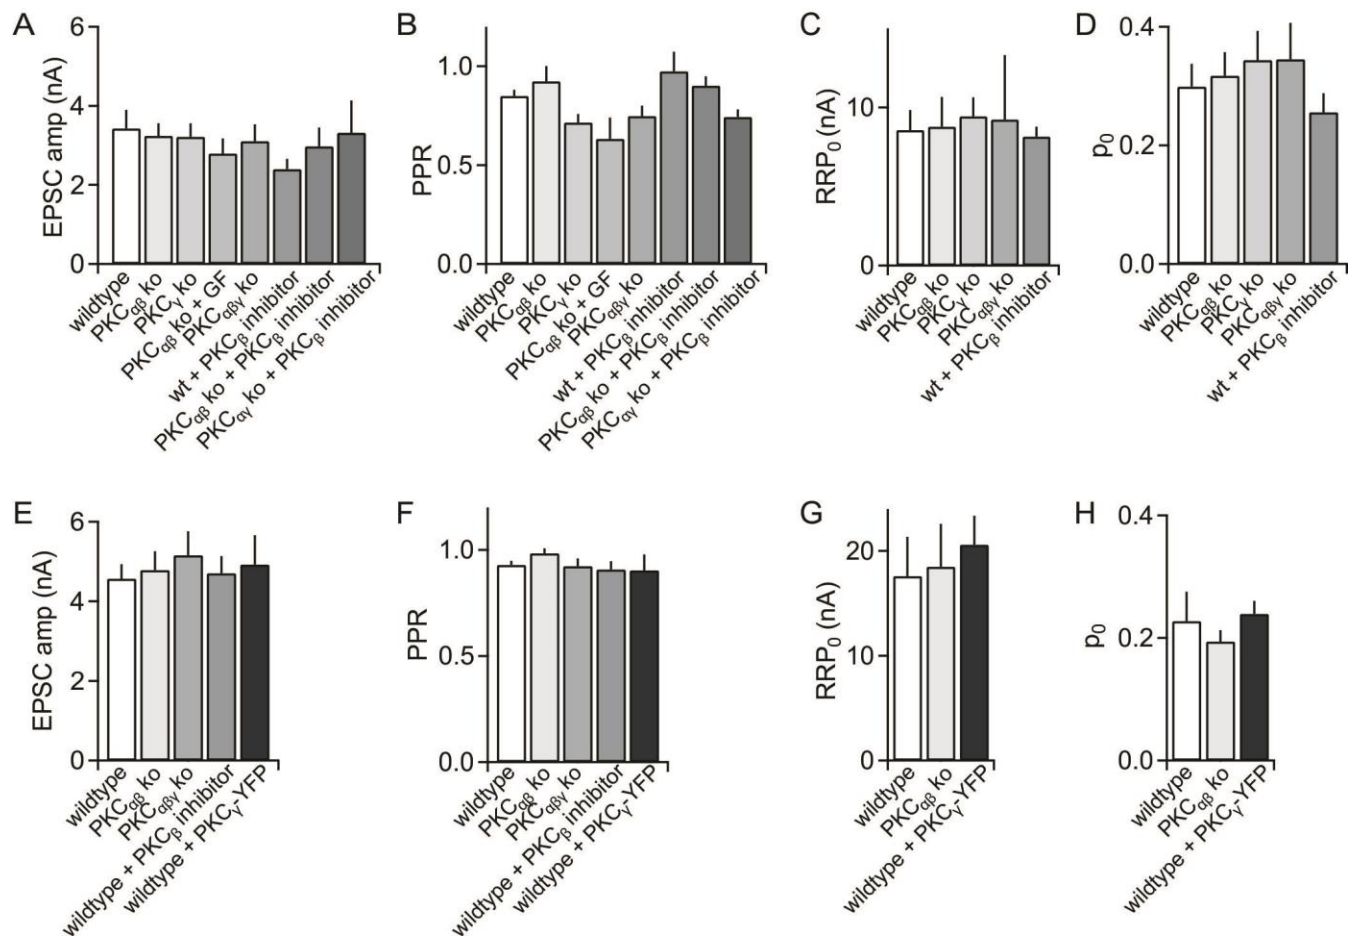

**Figure S1. Basal properties of synaptic transmission for different knockout animals and in the presence of different PKC inhibitors for pre-hearing (A-D) and hearing (E-H) animals. (A, E) EPSC amplitude measured in standard extracellular solution at a holding potential of -60 mV. (B, F) The basal paired-pulse ratio ( $\Delta t = 20$  ms) measured in all animal groups in standard extracellular solution. (C, D, G, H) Experiments performed in the presence of CTZ and kynurenate, as in **Figure 2**, were used to determine RRP $_0$  (C, G) and  $p_0$  (D, H). Pre-hearing animals were P8-10 and hearing animals were P16-19, with the exception of the wildtype + PKC $_{\gamma}$ -YFP (P19-21). N=8-21 for each condition, bars are mean  $\pm$  SEM, and there was no significant differences using one-way ANOVA tests in any of the parameters measured for each age group. Related to Figures 1, 2, 3, 5, 8 and 9.**

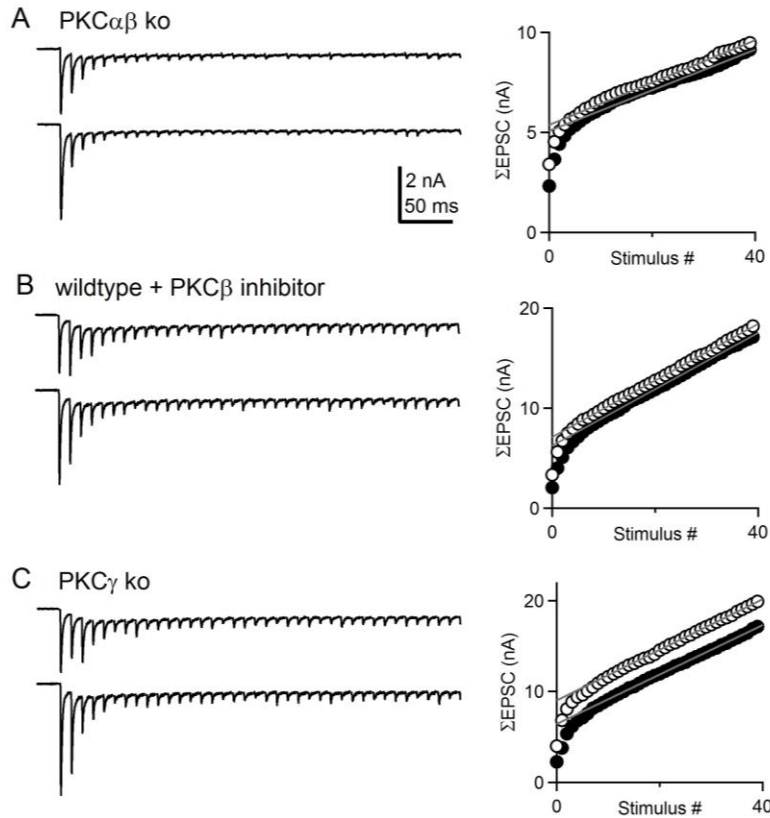

**Figure S2. Estimating the contribution of RRP and  $p$  to PTP in calyces from pre-hearing animals.** Representative experiments are shown that were used to assess the contributions of RRP and  $p$  to PTP in P8-10 animals for PKC $\alpha\beta$  knockout animals (**A**), wildtype animals in the presence of a PKC $\beta$  inhibitor (**B**), and PKC $\gamma$  knockout animals (**C**). Experiments were performed in the presence of CTZ and kynurenatate to prevent AMPA receptor saturation and desensitization. Synaptic currents evoked by the first 40 stimuli of 4s, 100 Hz train (*top, left traces*) and by a 40 pulse 100 Hz train (*bottom, left traces*) 10 s after tetanic stimulation (at the peak of PTP) are shown. Graphs on the right show cumulative EPSCs plotted as a function of stimulus number. The linear fit (gray lines) to the last 15 points was back-extrapolated to the y-axis to calculate the  $\Sigma$ EPSC, which provides a measure of the RRP<sub>train</sub>. Cumulative EPSCs for the first 40 stimuli of the tetanic train (closed circles) and for the second 40-pulse, 100 Hz train (open circles) are shown for representative cells from a PKC $\alpha\beta$  knockout animals (**A, right**), wildtype animals in the presence of a PKC $\beta$  inhibitor (**B, right**), and PKC $\gamma$  knockout animals (**C, right**). Related to Figures 3 and 5.

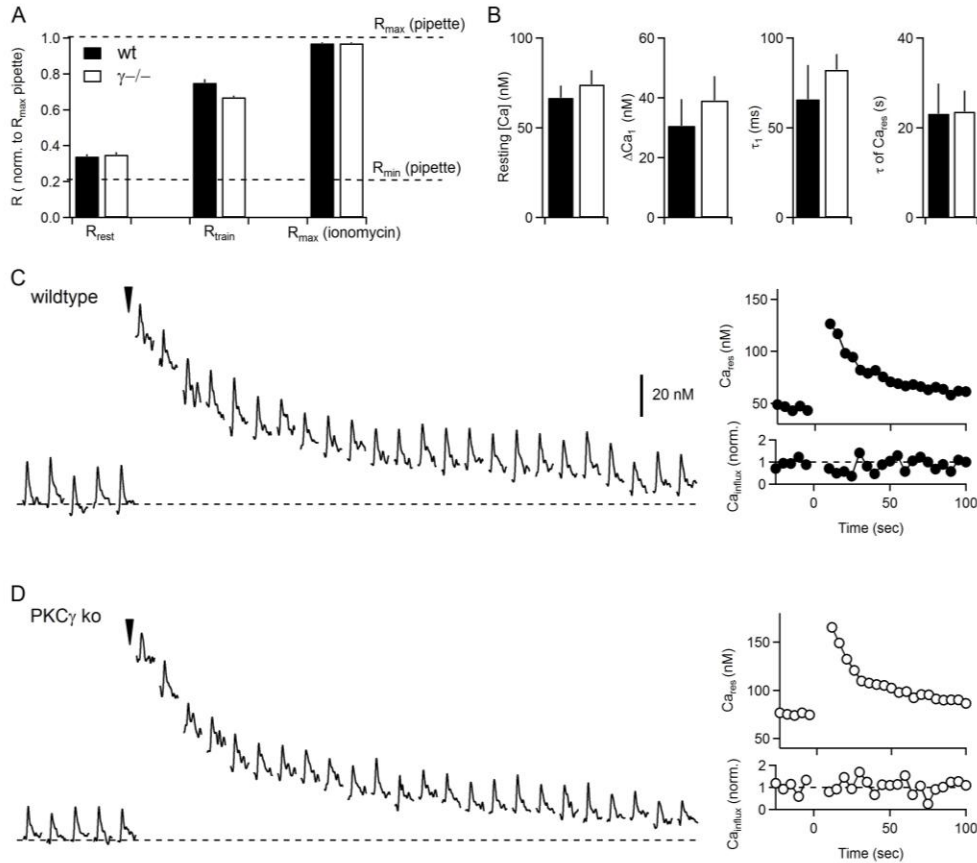

**Figure S3. Presynaptic calcium measurements at the calyx of Held from pre-hearing animals.** Calyces were bulk loaded with Calcium Green-1 dextran and Alexa 594.  $R$  is equal to the ratio of green to red fluorescence. **(A)** Calibration parameters are shown for calyces from P8-10 wildtype (wt) and PKC $\gamma$  ko animals.  $R_{rest}$  is the ratio of a calyx measured in the absence of stimulation.  $R_{train}$  was the average ratio in a calyx (from 3.90 to 3.95 s after the onset of stimulation) measured during a 4 s, 100 Hz train and  $R_{max}$  ionomycin was measured in calyces following the bath application of ionomycin. Values are normalized to the maximum fluorescence ( $R_{max}$  pipette), which was obtained with a sealed pipette containing 10 mM  $CaCl_2$ .  $R_{min}$  was determined in a similar manner, but using a solution with 10 mM EGTA substituted for  $CaCl_2$ . **(B)** Comparison of the resting calcium concentration, the amplitude of calcium transients evoked by a single stimulus ( $\Delta Ca_1$ ), the decay time constant of single calcium transients ( $\tau_1$ ), and the decay time constant ( $\tau$ ) of  $Ca_{res}$  following tetanic stimulation for wt and PKC $\gamma$  ko animals. **(C)** Representative example showing calcium measurements from the P9 calyx from a wildtype animal. The calyx was stimulated at 0.2 Hz before and after tetanic stimulation (4 s, 100 Hz,  $\blacktriangledown$ ). Individual calcium transient (*left*) were measured for 512 ms with a 4.5 s gap between measurements, and for display purposes the plot does not reflect the time gap between calcium measurements. Plot of the  $Ca_{res}$  (*top, right*) and the normalized amplitude of the calcium transient (*bottom, right*) are shown. **(D)** Similar to **C** but for a calyx from a P10 PKC $\gamma$  ko animal. Plots in (A,B) are mean  $\pm$  SEM. Related to Figure 6.

| <b>Animal group (n)</b>           | <b>PTP</b> |
|-----------------------------------|------------|
| <b>P16-19</b>                     |            |
| Wildtype (10)                     | 57 ± 11    |
| PKCαβ ko (12)                     | 8 ± 6      |
| Wildtype + PKCβ inhibitor (7)     | 12 ± 1     |
| <b>P8-10</b>                      |            |
| Wildtype (12)                     | 60 ± 10    |
| PKCαβ ko (13)                     | 40 ± 9     |
| PKCγ ko (14)                      | 54 ± 8     |
| PKCαβγ ko (17)                    | 12 ± 9     |
| Wildtype + PKCβ inhibitor(10)     | 59 ± 15    |
| PKCαγ ko (10)                     | 61 ± 11    |
| PKCαγ ko + PKCβ inhibitor (12)    | 17 ± 5     |
| PKCαβ ko + PKCβ inhibitor (3)     | 54 ± 15    |
| PKCαβ ko + pan-PKC inhibitor (11) | 14 ± 3     |

**Table S1. Magnitude of PTP.** The number of cells (n) is listed next to each animal group for P8-10 animals (bottom) and P16-19 animals (top). Experiments were conducted in the absence of cyclothiazide and kynurenate. All values reported are mean percent changes ± SEM. Related to Figure 9.

| Animal group (n)                | PTP     | RRP <sub>train</sub> | $p_{train}$ | RRP <sub>trainC</sub> | $p_{trainC}$ | RRP <sub>EQ</sub> | $p_{EQ}$ | PPR      |
|---------------------------------|---------|----------------------|-------------|-----------------------|--------------|-------------------|----------|----------|
| <b>P16-19</b>                   |         |                      |             |                       |              |                   |          |          |
| Wildtype (8)                    | 52 ± 9  | 40 ± 9               | 9 ± 5       | 34 ± 9                | 15 ± 6       | 30 ± 7            | 18 ± 5   | -14 ± 5  |
| PKCαβ ko (12)                   | 19 ± 6  | 7 ± 5                | 17 ± 6      | 4 ± 4                 | 21 ± 7       | 9 ± 5             | 17 ± 8   | -20 ± 17 |
| Wildtype + PKCγ-YFP (9)         | 75 ± 9  | 22 ± 6               | 63 ± 11     | 11 ± 5                | 58 ± 5       | 2 ± 4             | 74 ± 13  | -35 ± 3  |
| Wildtype + no PKCγ-YFP (3)      | 60 ± 7  | 52 ± 12              | 6 ± 7       | 45 ± 10               | 11 ± 7       | 25 ± 6            | 20 ± 5   | -18 ± 1  |
| <b>P8-10</b>                    |         |                      |             |                       |              |                   |          |          |
| Wildtype (10)                   | 67 ± 16 | 21 ± 6               | 37 ± 11     | 18 ± 6                | 42 ± 12      | 11 ± 5            | 52 ± 15  | -42 ± 8  |
| PKCαβ ko (9)                    | 42 ± 11 | -0.4 ± 4             | 42 ± 7      | -2 ± 4                | 45 ± 9       | 2 ± 3             | 45 ± 10  | -35 ± 6  |
| PKCγ ko (8)                     | 64 ± 11 | 36 ± 12              | 21 ± 10     | 37 ± 13               | 20 ± 11      | 38 ± 13           | 17 ± 12  | -12 ± 7  |
| PKCαβγ (4)                      | 7 ± 12  | 5 ± 7                | 6 ± 17      | 7 ± 10                | 5 ± 18       | 5 ± 6             | 4 ± 16   | -6 ± 2   |
| Wildtype + PKCαβ inhibitor (14) | 56 ± 17 | 9 ± 5                | 44 ± 16     | 8 ± 5                 | 47 ± 16      | 9 ± 4             | 44 ± 15  | -34 ± 5  |

**Table S2. Contributions of RRP and  $p$  to PTP quantified using three different methods.** Table summarizes the magnitude of PTP and the contributions of pool size (RRP) and release probability ( $p$ ) for all animal groups. RRP and  $p$  data were calculated using the cumulative EPSC method (RRP<sub>train</sub>,  $p_{train}$ ), the corrected EPSC method (RRP<sub>trainC</sub>,  $p_{trainC}$ ) and the Elmqvist and Quastel method (RRP<sub>EQ</sub>,  $p_{EQ}$ ) for P8-10 animals (bottom) and P16-19 animals (top). The number of cells (n) is listed next to each animal group. These are different experiments than those summarized in **Table S1**, and all experiments were conducted in the presence of cyclothiazide and kynurenatate. All values reported are mean percent changes ± SEM. Related to Figure 9.
